# Supplementary material for: Chemical-diffusion Metamaterials with “Plug and Switch” Modules for Ion Cloaking, Concentrating and Selection: Design and Experiments
Source: Research Square preprint supplement (doi:10.21203/rs.3.rs-466840/v1), 2021-05-17
Supplement: Supplementary file 1 [file dd5a9bc7aa053acd1f46b159.docx]

Supplementary information

**Chemical-diffusion Metamaterials with “Plug and Switch” Modules for Ion Cloaking, Concentrating and Selection: Design and Experiments**

*Yang Li, Chengye Yu, Chuanbao Liu, Zhengjiao Xu, Yanjing Su, Lijie Qiao, Ji Zhou, and Yang Bai**

Y. Li, C. Yu, Z. Xu, Prof. Y. Su, Prof. L. Qiao, Prof. Y. Bai

Beijing Advanced Innovation Center for Materials Genome Engineering

Institute for Advanced Materials and Technology

University of Science and Technology Beijing

Beijing 100083, China

E-mail: [baiy@mater.ustb.edu.cn](mailto:baiy@mater.ustb.edu.cn) (Y. Bai)

Dr. C. Liu

School of Materials Science and Engineering

University of Science and Technology Beijing

Beijing 100083, China

Prof. J. Zhou

State Key Laboratory of New Ceramics and Fine Processing

School of Materials Science and Engineering

Tsinghua University

Beijing 100084, China

**Correspondence and requests for materials should be addressed to Y.B.**

## Supplementary Figure


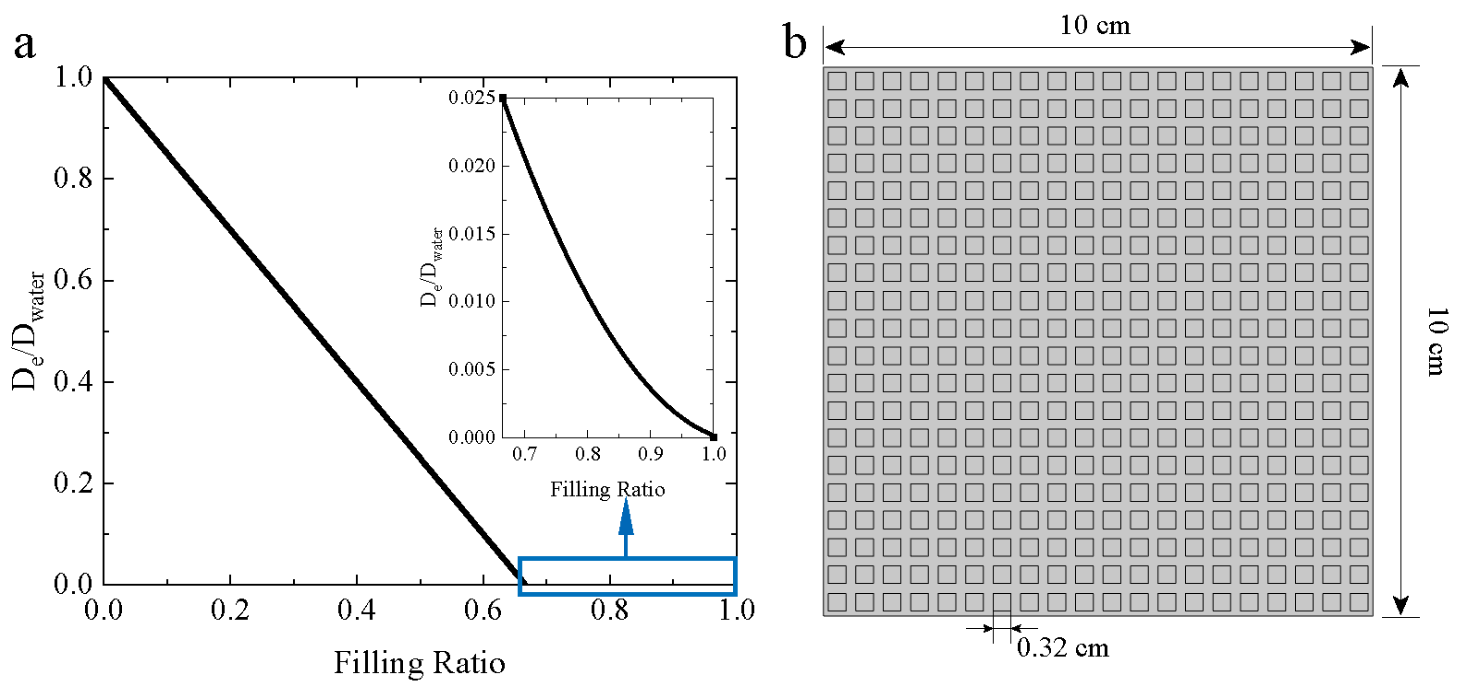


**Supplementary Fig. 1 | Optimized parameters for effective diffusivity.** **a** Calculated dependence of effective diffusivity on filling ratio of resin pillars. **b** Optimized parameters of background with effective diffusivity of 5/13 *Dwater*.


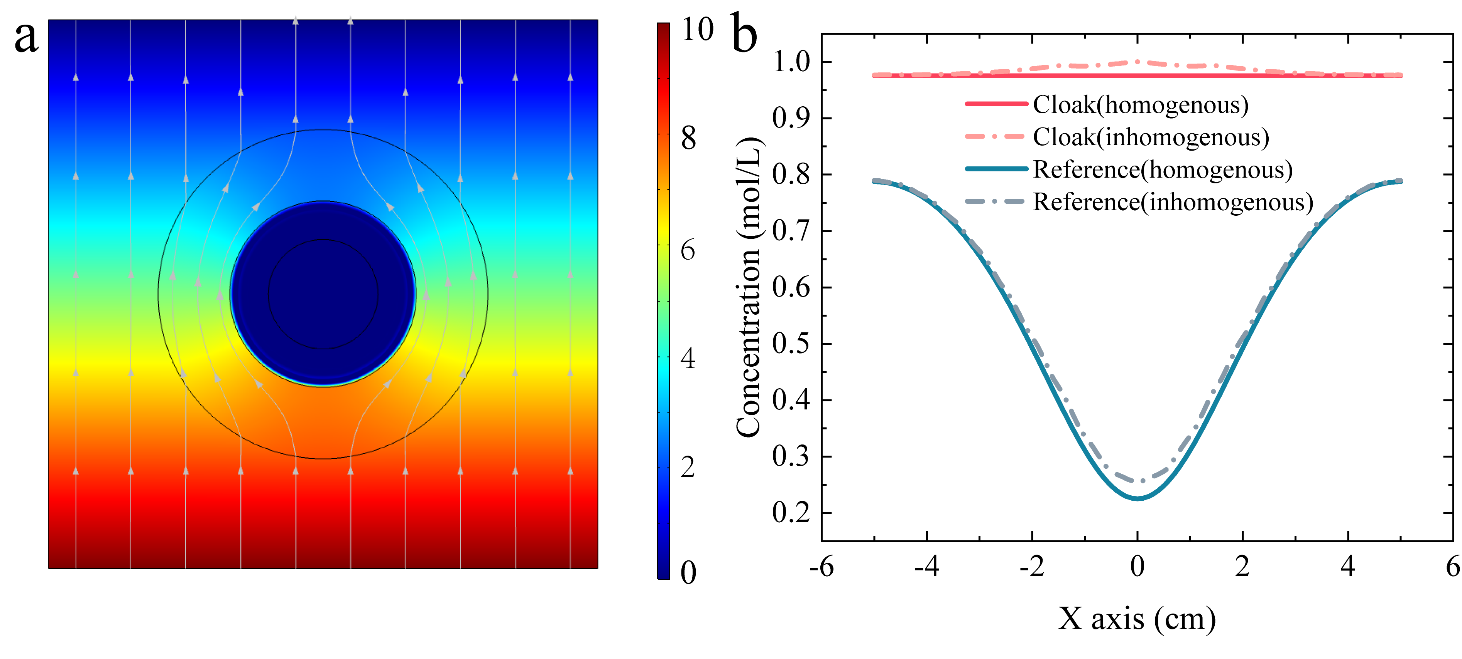


**Supplementary Fig. 2 | Comparison of cloak with ideal homogenous diffusivity and inhomogeneous diffusivity.** **a** Concentration surface and flux lines for idea cloak. **b** Concentration distribution at line y=-4 cm with and without cloak for homogenous and inhomogeneous cases.


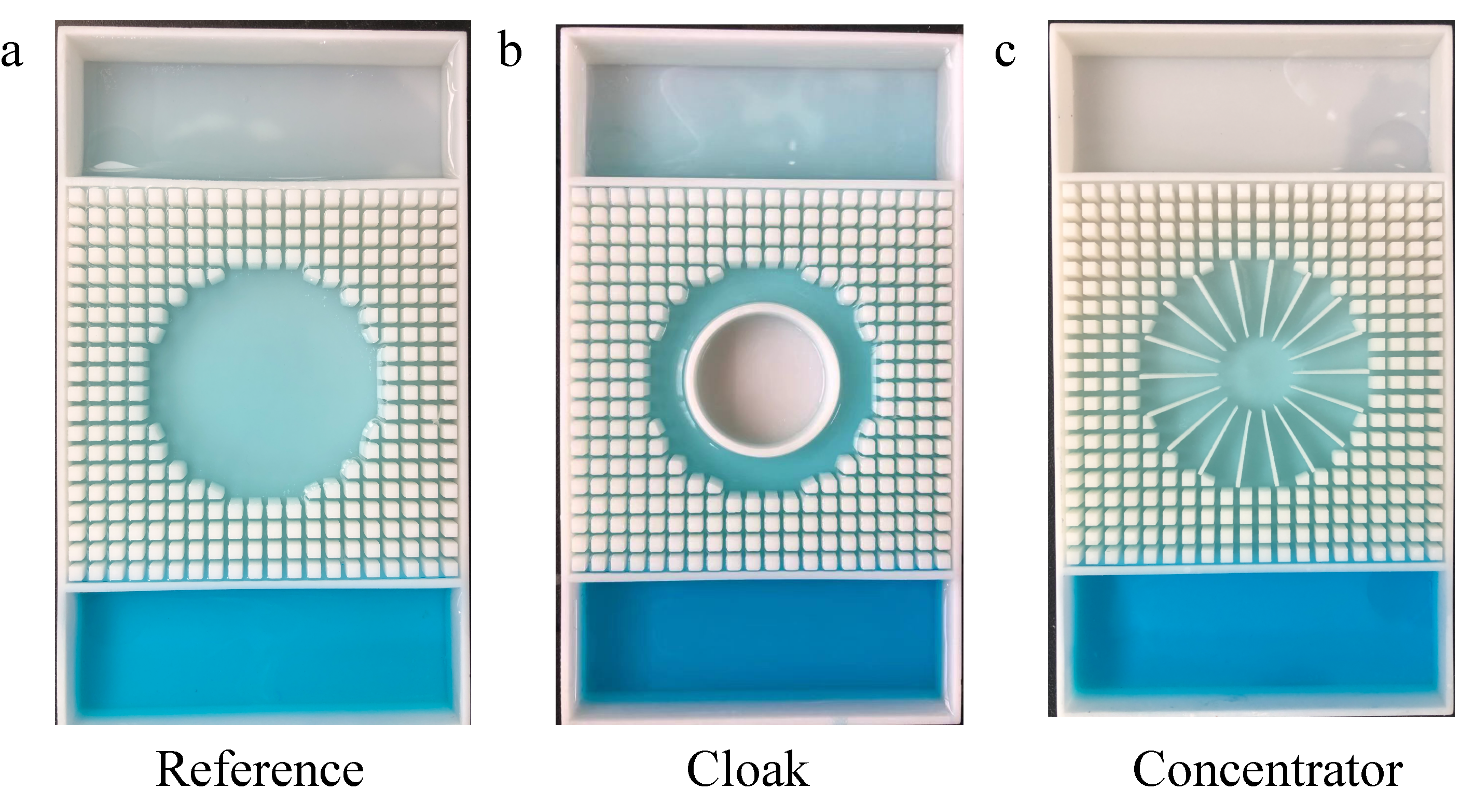


**Supplementary Fig. 3 | Experimental setup.** Multichannel pipette is used to transfer solution along line y= -3.5 cm for **a** reference, **b** cloak and **c** concentrator.


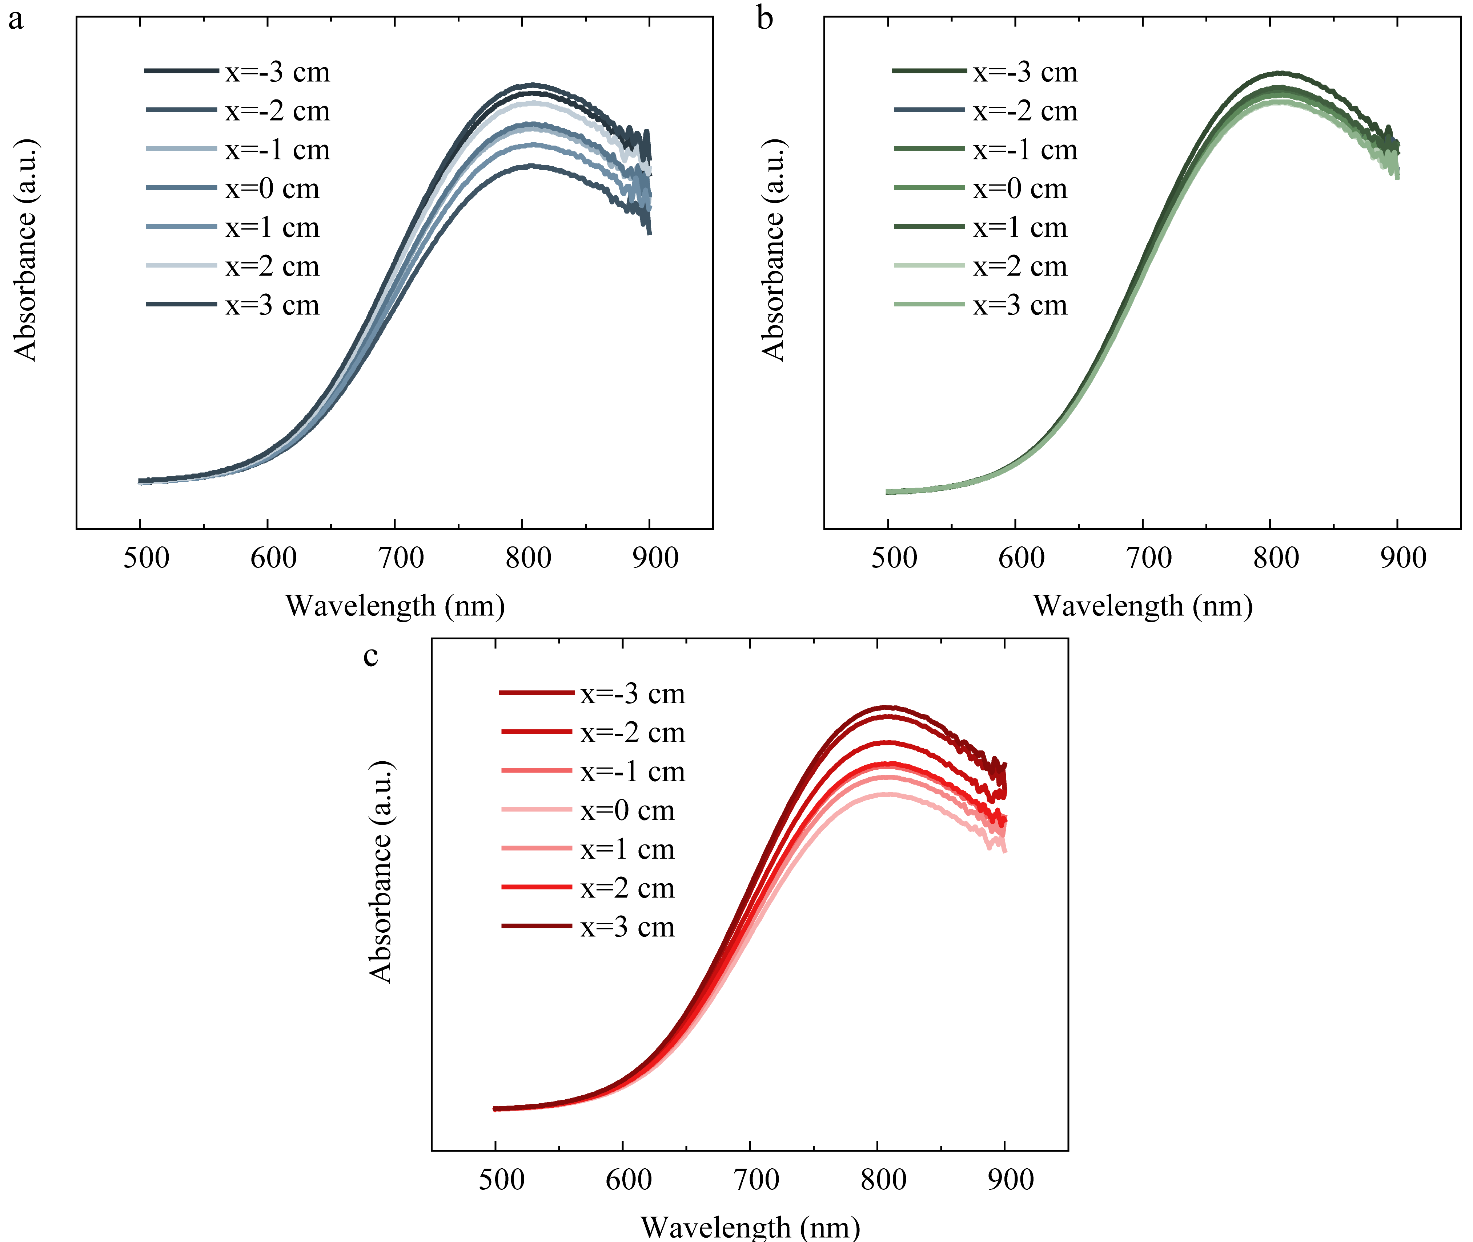


**Supplementary Fig. 4 | Measured absorbance at line y= -3.5 cm.** Absorbance is tested for 7 spots spaced 1 cm for **a** reference, **b** cloak and **c** concentrator.


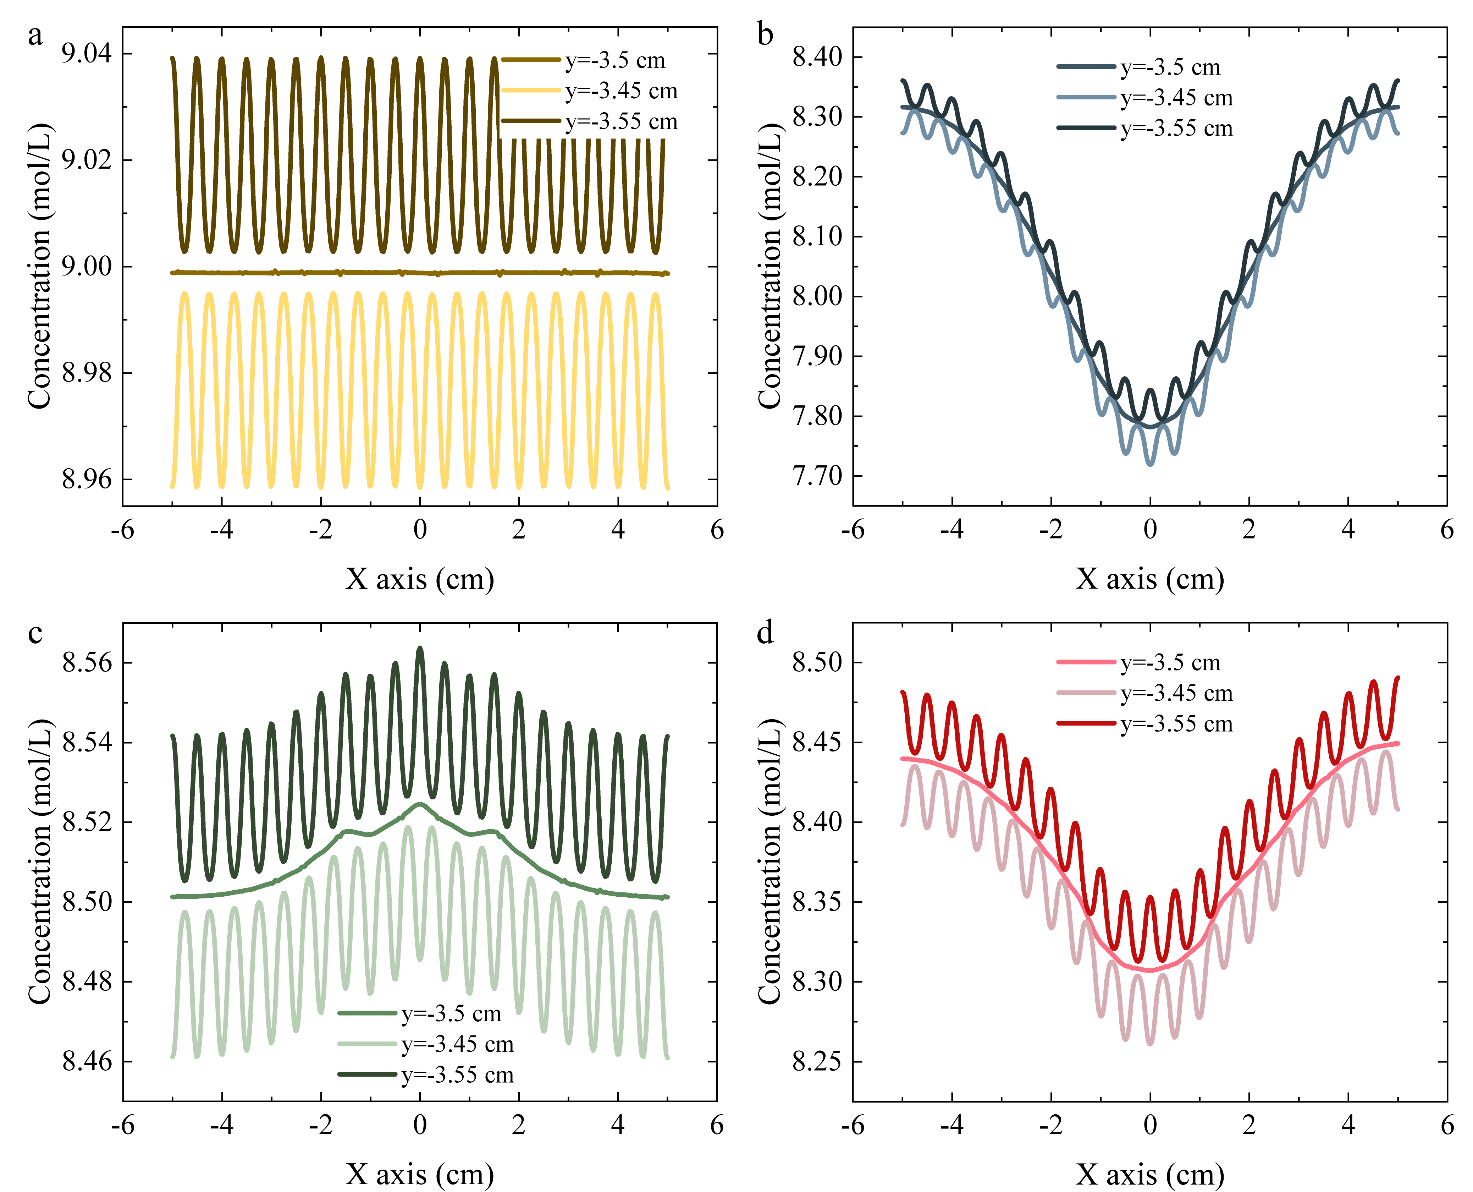


**Supplementary Fig. 5 | Simulated results of scattering details of resin pillars.** Simulated results of concentration distribution at line y= -3.5, -3.45, -3.55 cm. Concentration distribution for **a** background, **b** reference, **c** cloak and **d** concentrator.


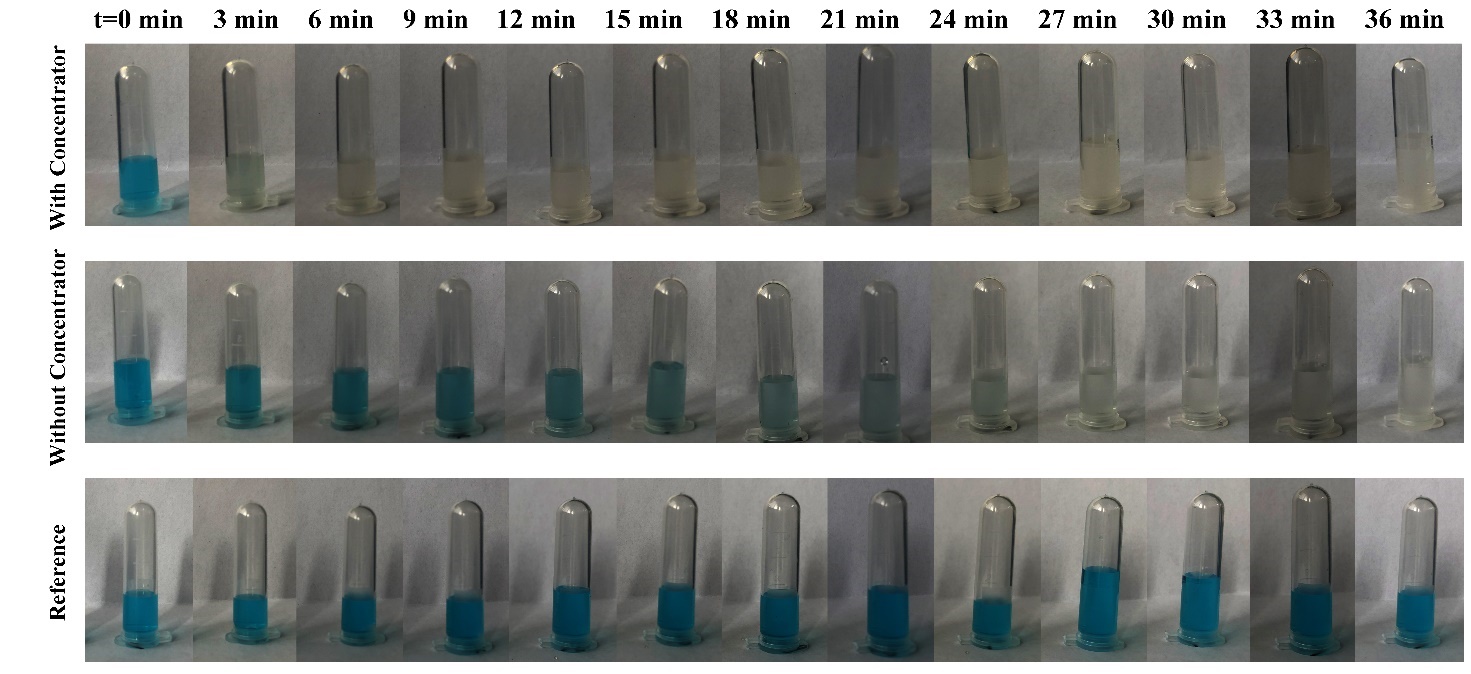


**Supplementary Fig. 6 | Experimental demonstration of catalytic efficiency of organic dye degradation.** Mix the precursor solution with solution taken from inside the cloak and outside the cloak. Take 2 ml solution every 3 min to observe degrade efficiency. The last row are blank reference.


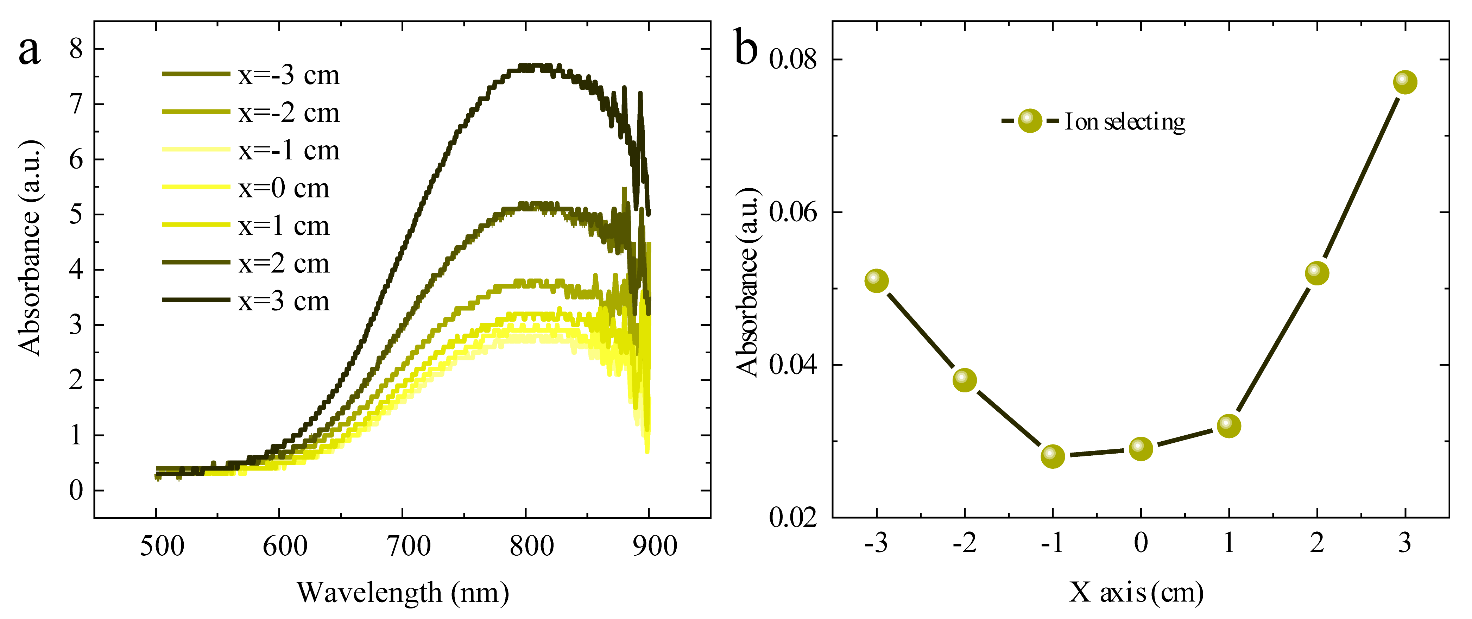


**Supplementary Fig. 7 | Measured results at line y= -3.5 cm for ion selecting metamaterials. a** Measure results of absorbances of 7 spots spaced 1cm along line y= -3.5 cm. **b** Measure results of concentration distribution at line y= -3.5.
